# Supplementary material
Source: MDPI journal article supplement (https://www.mdpi.com/2072-4292/16/3/596)
Supplement: s1 [file s1 › remotesensing-2739520-supplementary.pdf]

# Seasonal Variation of the mesospheric Ca layer and Ca<sup>+</sup> layer Simultaneously Observation over Beijing (40.41°N, 116.01°E)

Yuchang Xun <sup>1' 2</sup>, Peng Zhao <sup>1' 2</sup>, Zelong Wang <sup>2' 3</sup>, Lifang Du <sup>2</sup>, Jing Jiao<sup>2</sup>, Zhishan Chen<sup>1' 2</sup>, Haoran Zheng <sup>2</sup>, Shaohua Gong<sup>4</sup>, and Guotao Yang <sup>2,\*</sup>

## Contents of this file

Introduction

Figure S1

Table S1

## Introduction

In this supporting information, Figure S1 shows the average temperature over Beijing at 80~100km.

Table S1 listed the relevant ion-molecule reactions of Ca [1,2] . These reactions were used to calculate the first-order-neutralization rates of Ca<sup>+</sup> by dissociative recombination and direct (radiative) recombination (Referring to the method of Wu et al. [3] , Qiu et al. [4] , Jiao et al. [5] , and Plane [6]).

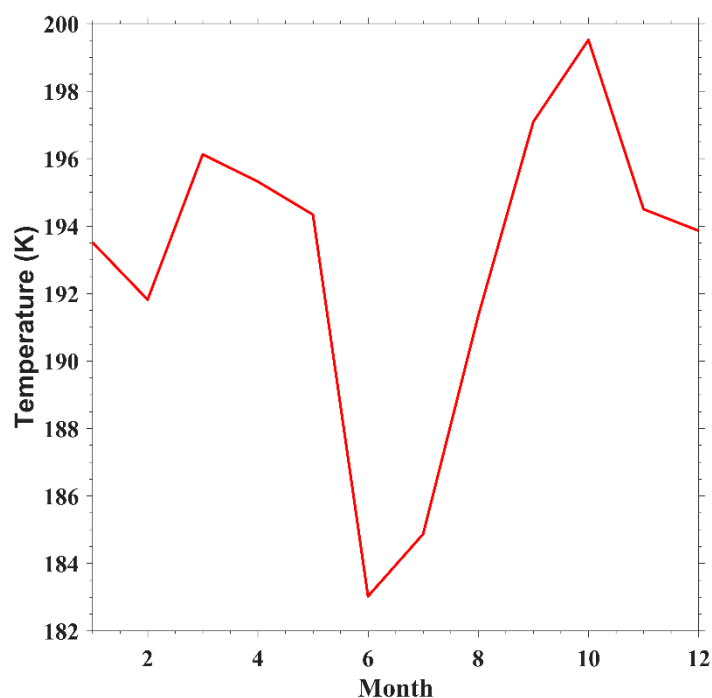

**Figure S1.** Annual variation of 80~100km mean temperature over Beijing with time (temperature data from WACCM)

**Table S1.** Ca Ion-Molecule Reactions and Rate Coefficients:

| NO. | Reaction                                                        | Rate Coefficient     |
|-----|-----------------------------------------------------------------|----------------------|
| 1   | $\text{Ca} + \text{O}_2^+ \rightarrow \text{Ca}^+ + \text{O}_2$ | $1.8 \times 10^{-9}$ |

|    |                                                                                                                         |                                                          |
|----|-------------------------------------------------------------------------------------------------------------------------|----------------------------------------------------------|
| 2  | $\text{Ca} + \text{NO}^+ \rightarrow \text{Ca}^+ + \text{NO}$                                                           | $4.0 \times 10^{-9}$                                     |
| 3  | $\text{Ca}^+ + \text{O}_3 \rightarrow \text{CaO}^+ + \text{O}_2$                                                        | $3.9 \times 10^{-10}$                                    |
| 4  | $\text{CaO}^+ + \text{O} \rightarrow \text{Ca}^+ + \text{O}_2$                                                          | $4.2 \times 10^{-11}$                                    |
| 5  | $\text{Ca}^+ + \text{O}_2(+\text{M}) \rightarrow \text{CaO}_2^+$                                                        | $4.2 \times 10^{-29} \left(\frac{T}{200}\right)^{-2.37}$ |
| 6  | $\text{CaO}_2^+ + \text{O} \rightarrow \text{CaO}^+ + \text{O}_2$                                                       | $1.0 \times 10^{-10}$                                    |
| 7  | $\text{Ca}^+ + \text{N}_2 + \text{M} \rightarrow \text{Ca} \cdot \text{N}_2^+ + \text{M}$                               | $2.3 \times 10^{-30} \left(\frac{T}{200}\right)^{-2.49}$ |
| 8  | $\text{Ca}^+ + \text{CO}_2(+\text{M}) \rightarrow \text{Ca}^+ \cdot \text{CO}_2$                                        | $4.3 \times 10^{-29} \left(\frac{T}{200}\right)^{-3.09}$ |
| 9  | $\text{Ca}^+ + \text{H}_2\text{O}(+\text{M}) \rightarrow \text{Ca}^+ \cdot \text{H}_2\text{O}$                          | $1.2 \times 10^{-28} (T/200)^{-2.12}$                    |
| 10 | $\text{Ca} \cdot \text{N}_2^+ + \text{O}_2 \rightarrow \text{CaO}_2^+ + \text{N}_2$                                     | $3 \times 10^{-10}$                                      |
| 11 | $\text{Ca}^+ \cdot \text{CO}_2 + \text{O}_2 \rightarrow \text{CaO}_2^+ + \text{CO}_2$                                   | $1.2 \times 10^{-10}$                                    |
| 12 | $\text{Ca}^+ \cdot \text{CO}_2 + \text{H}_2\text{O} \rightarrow \text{Ca}^+ \cdot \text{H}_2\text{O} + \text{CO}_2$     | $1.3 \times 10^{-9}$                                     |
| 13 | $\text{Ca}^+ \cdot \text{H}_2\text{O} + \text{O}_2 \rightarrow \text{CaO}_2^+ + \text{H}_2\text{O}$                     | $4.0 \times 10^{-10}$                                    |
| 14 | $\text{CaX}^+ + e^- \rightarrow \text{Ca} + \text{X} \text{ (X = O, O}_2, \text{N}_2, \text{CO}_2, \text{H}_2\text{O)}$ | $3 \times 10^{-7} (T/295)^{-\frac{1}{2}}$                |
| 15 | $\text{Ca}^+ + e^- \rightarrow \text{Ca} + h\nu$                                                                        | $3.8 \times 10^{-12} (T/200)^{-0.9}$                     |

the first-order rate coefficient  $k(\text{Ca}^+ \rightarrow \text{Ca})$  for the neutralization of  $\text{Ca}^+$  was calculated as follows:

$$k(\text{Ca}^+ \rightarrow \text{Ca}) = k_3[\text{O}_3] \times \text{Pr}(\text{CaO}^+ \rightarrow \text{Ca}) + k_5[\text{O}_2][\text{M}] \times \text{Pr}(\text{CaO}_2^+ \rightarrow \text{Ca}) \\ + k_7[\text{N}_2][\text{M}] \times \text{Pr}(\text{CaN}_2^+ \rightarrow \text{Ca}) + k_8[\text{CO}_2][\text{M}] \times \text{Pr}(\text{Ca}^+ \text{CO}_2 \rightarrow \text{Ca}) \\ + k_9[\text{H}_2\text{O}][\text{M}] \times \text{Pr}(\text{Ca}^+ \text{H}_2\text{O} \rightarrow \text{Ca})$$

where  $\text{Pr}()$  denotes the branching probability:

$$1. k_3[\text{O}_3] \times \text{Pr}(\text{CaO}^+ \rightarrow \text{Ca}) = k_3[\text{O}_3] \cdot \left( \frac{k_{14}[e^-]}{k_{14}[e^-] + k_4[\text{O}]} \right)$$

$$2. k_5[\text{O}_2][\text{M}] \times \text{Pr}(\text{CaO}_2^+ \rightarrow \text{Ca}) = k_5[\text{O}_2][\text{M}] \times \{ \text{Pr}(\text{CaO}_2^+ \rightarrow \text{Ca direct}) + \text{Pr}(\text{CaO}_2^+ \rightarrow \text{CaO}^+) \times \text{Pr}(\text{CaO}^+ \rightarrow \text{Ca}) \}$$

$$k_5[\text{O}_2][\text{M}] \times \text{Pr}(\text{CaO}_2^+ \rightarrow \text{Ca}) = k_5[\text{O}_2][\text{M}] \cdot \left\{ \frac{k_{14}[e^-]}{k_{14}[e^-] + k_6[\text{O}]} + \frac{k_6[\text{O}]}{k_{14}[e^-] + k_6[\text{O}]} \cdot \frac{k_{14}[e^-]}{k_{14}[e^-] + k_4[\text{O}]} \right\}$$

$$3. k_7[\text{N}_2][\text{M}] \times \text{Pr}(\text{CaN}_2^+ \rightarrow \text{Ca}) = k_7[\text{N}_2][\text{M}] \times \{ \text{Pr}(\text{CaN}_2^+ \rightarrow \text{Ca direct}) + \text{Pr}(\text{CaN}_2^+ \rightarrow \text{CaO}_2^+) \\ \times \text{Pr}(\text{CaO}_2^+ \rightarrow \text{Ca}) \}$$

$$k_7[N_2][M] \times Pr(CaN_2^+ \rightarrow Ca) = k_7[N_2][M] \times \left\{ \frac{k_{14}[e^-]}{k_{14}[e^-] + k_{10}[O_2]} + \frac{k_{10}[O_2]}{k_{14}[e^-] + k_{10}[O_2]} \cdot \left\{ \frac{k_{14}[e^-]}{k_{14}[e^-] + k_6[O]} + \frac{k_6[O]}{k_{14}[e^-] + k_6[O]} \cdot \frac{k_{14}[e^-]}{k_{14}[e^-] + k_4[O]} \right\} \right\}$$

$$4. k_8[CO_2][M] \times Pr(Ca^+CO_2 \rightarrow Ca) = k_8[CO_2][M] \times \{Pr(Ca^+CO_2 \rightarrow Ca \text{ direct}) + Pr(Ca^+CO_2 \rightarrow CaO_2^+) \times Pr(CaO_2^+ \rightarrow Ca) + Pr(Ca^+CO_2 \rightarrow Ca^+H_2O) \times Pr(Ca^+H_2O \rightarrow Ca)\}$$

$$k_8[CO_2][M] \times Pr(Ca^+CO_2 \rightarrow Ca) = k_8[CO_2][M] \times \left\{ \frac{k_{14}[e^-]}{k_{14}[e^-] + k_{11}[O_2] + k_{12}[H_2O]} + \frac{k_{11}[O_2]}{k_{14}[e^-] + k_{11}[O_2] + k_{12}[H_2O]} \times Pr(CaO_2^+ \rightarrow Ca) + \frac{k_{12}[H_2O]}{k_{14}[e^-] + k_{11}[O_2] + k_{12}[H_2O]} \cdot \left\{ \frac{k_{14}[e^-]}{k_{14}[e^-] + k_{13}[O_2]} + \frac{k_{13}[O_2]}{k_{14}[e^-] + k_{13}[O_2]} \times Pr(CaO_2^+ \rightarrow Ca) \right\} \right\}$$

$$k_8[CO_2][M] \times Pr(Ca^+CO_2 \rightarrow Ca) = k_8[CO_2][M] \times \left\{ \frac{k_{14}[e^-]}{k_{14}[e^-] + k_{11}[O_2] + k_{12}[H_2O]} + \frac{k_{11}[O_2]}{k_{14}[e^-] + k_{11}[O_2] + k_{12}[H_2O]} \cdot \left\{ \frac{k_{14}[e^-]}{k_{14}[e^-] + k_6[O]} + \frac{k_6[O]}{k_{14}[e^-] + k_6[O]} \cdot \frac{k_{14}[e^-]}{k_{14}[e^-] + k_4[O]} \right\} + \frac{k_{12}[H_2O]}{k_{14}[e^-] + k_{11}[O_2] + k_{12}[H_2O]} \cdot \left\{ \frac{k_{14}[e^-]}{k_{14}[e^-] + k_{13}[O_2]} + \frac{k_{13}[O_2]}{k_{14}[e^-] + k_{13}[O_2]} \cdot \left( \frac{k_{14}[e^-]}{k_{14}[e^-] + k_6[O]} + \frac{k_6[O]}{k_{14}[e^-] + k_6[O]} \cdot \frac{k_{14}[e^-]}{k_{14}[e^-] + k_4[O]} \right) \right\} \right\}$$

$$5. k_9[H_2O][M] \times Pr(Ca^+H_2O \rightarrow Ca) = k_9[H_2O][M] \times \{Pr(Ca^+H_2O \rightarrow Ca \text{ direct}) + Pr(Ca^+H_2O \rightarrow CaO_2^+) \times (Pr(CaO_2^+ \rightarrow Ca))\}$$

$$k_9[H_2O][M] \times Pr(Ca^+H_2O \rightarrow Ca) = k_9[H_2O][M] \times \left\{ \frac{k_{14}[e^-]}{k_{14}[e^-] + k_{13}[O_2]} + \frac{k_{13}[O_2]}{k_{14}[e^-] + k_{13}[O_2]} \cdot \left\{ \frac{k_{14}[e^-]}{k_{14}[e^-] + k_6[O]} + \frac{k_6[O]}{k_{14}[e^-] + k_6[O]} \cdot \frac{k_{14}[e^-]}{k_{14}[e^-] + k_4[O]} \right\} \right\}$$

As  $[CO_2]$  is three orders of magnitude smaller than  $[O_2]$ ,  $k_5$  and  $k_8$  are one order of magnitude smaller,  $[H_2O]$  is five orders of magnitude smaller than  $[O_2]$ , and  $k_9$  is only one order of magnitude larger than  $k_5$ , ignore terms 4 and 5 [3].

So:

$$\begin{aligned} k(Ca^+ \rightarrow Ca) &= k_3[O_3] \times Pr(CaO^+ \rightarrow Ca) + k_5[O_2][M] \times Pr(CaO_2^+ \rightarrow Ca) + k_7[N_2][M] \times Pr(CaN_2^+ \rightarrow Ca) \\ &= k_3[O_3] \cdot \left( \frac{k_{14}[e^-]}{k_{14}[e^-] + k_4[O]} \right) + k_5[O_2][M] \cdot \left\{ \frac{k_{14}[e^-]}{k_{14}[e^-] + k_6[O]} + \frac{k_6[O]}{k_{14}[e^-] + k_6[O]} \cdot \frac{k_{14}[e^-]}{k_{14}[e^-] + k_4[O]} \right\} \\ &\quad + k_7[N_2][M] \cdot \left\{ \frac{k_{14}[e^-]}{k_{14}[e^-] + k_{10}[O_2]} + \frac{k_{10}[O_2]}{k_{14}[e^-] + k_{10}[O_2]} \cdot \left\{ \frac{k_{14}[e^-]}{k_{14}[e^-] + k_6[O]} + \frac{k_6[O]}{k_{14}[e^-] + k_6[O]} \cdot \frac{k_{14}[e^-]}{k_{14}[e^-] + k_4[O]} \right\} \right\} \\ &= k_3[O_3] \cdot \left( \frac{k_{14}[e^-]}{k_{14}[e^-] + k_4[O]} \right) + (k_5[O_2][M] + k_7[N_2][M] \cdot \frac{k_{10}[O_2]}{k_{14}[e^-] + k_{10}[O_2]}) \cdot \left\{ \frac{k_{14}[e^-]}{k_{14}[e^-] + k_6[O]} + \frac{k_6[O]}{k_{14}[e^-] + k_6[O]} \cdot \frac{k_{14}[e^-]}{k_{14}[e^-] + k_4[O]} \right\} \end{aligned}$$

$$\left\{ \frac{k_{14}[e^-]}{k_{14}[e^-] + k_6[O]} + \frac{k_6[O]}{k_{14}[e^-] + k_6[O]} \cdot \frac{k_{14}[e^-]}{k_{14}[e^-] + k_4[O]} \right\} + k_7[N_2][M] \cdot \frac{k_{14}[e^-]}{k_{14}[e^-] + k_{10}[O_2]}$$

## References

1. Plane, J.M.; Feng, W.; Dawkins, E.C. The mesosphere and metals: Chemistry and changes. *Chemical reviews* **2015**, *115*, 4497-4541.
2. Plane, J.; Feng, W.; Gómez Martín, J.C.; Gerding, M.; Raizada, S. A new model of meteoric calcium in the mesosphere and lower thermosphere. *Atmospheric Chemistry and Physics* **2018**, *18*, 14799-14811.
3. Wu, F.; Chu, X.; Du, L.; Jiao, J.; Zheng, H.; Xun, Y.; Feng, W.; Plane, J.M.; Yang, G. First Simultaneous Lidar Observations of Thermosphere-Ionosphere Sporadic Ni and Na (TISNi and TISNa) Layers (~ 105–120 km) Over Beijing (40.42° N, 116.02° E). *Geophysical Research Letters* **2022**, *49*, e2022GL100397.
4. Qiu, S.; Wang, N.; Soon, W.; Lu, G.; Jia, M.; Wang, X.; Xue, X.; Li, T.; Dou, X. The sporadic sodium layer: a possible tracer for the conjunction between the upper and lower atmospheres. *Atmospheric Chemistry and Physics* **2021**, *21*, 11927-11940.
5. Jiao, J.; Yang, G.; Wang, J.; Feng, W.; Plane, J. Observations of dramatic enhancements to the mesospheric K layer. *Geophysical Research Letters* **2017**, *44*, 12,536-12,542.
6. Plane, J. A new time-resolved model of the mesospheric Na layer: constraints on the meteor input function. *Atmospheric Chemistry and Physics Discussions* **2004**, *4*, 39-69.
